# Supplementary material for: Ultrathin Ceramic Membranes as Scaffolds for Functional Cell Coculture Models on a Biomimetic Scale
Source: PubMed Central journal article supplement (PMC4691652; doi:10.1089/biores.2015.0037), 2015-12-01
Supplement: Supp_Figure2.pdf [file Supp_Figure2.pdf]

Epithelial cells  
■ F-Actin  
■ Cell nuclei  
■ E-Cadherin

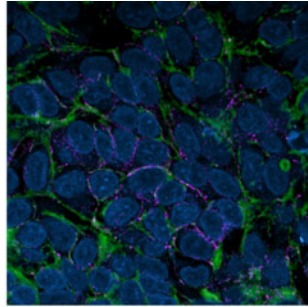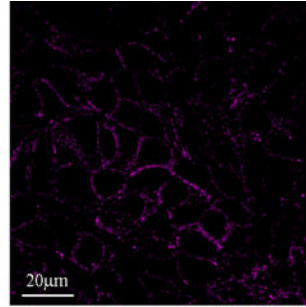

Endothelial cells  
■ F-Actin  
■ Cell nuclei  
□ Von Willebrand factor

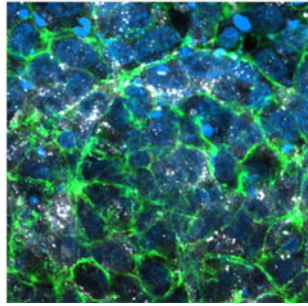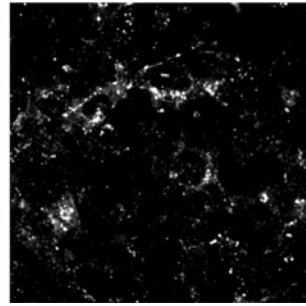

**SUPPLEMENTARY FIG. S2.** Laser scanning micrographs of epithelial cells (A549) stained for F-actin (green), cell nuclei (blue), and E-cadherin (pink) and endothelial cells (Eahy) stained for F-actin (green), cell nuclei (blue), and Von Willebrand factor (white). The images represent single xy layers.
